1 **Natural killer cells inhibit *Plasmodium falciparum* growth in red blood cells**  
2 **via antibody-dependent cellular cytotoxicity**

3

4 Gunjan Arora,<sup>1</sup> Geoffrey T. Hart,<sup>1,2</sup> Javier Manzella-Lapeira,<sup>1</sup> Justin Y.A. Doritchamou,<sup>3</sup> David

5 L. Narum,<sup>3</sup> L. Michael Thomas,<sup>1</sup> Joseph Brzostowski,<sup>1</sup> Sumati Rajagopalan,<sup>1</sup> Ogobara K.

6 Doumbo,<sup>4</sup> Boubacar Traore,<sup>4</sup> Louis H. Miller,<sup>5</sup> Susan K. Pierce,<sup>1</sup> Patrick E. Duffy,<sup>3</sup> Peter D.

7 Crompton,<sup>1</sup> Sanjay A. Desai,<sup>5</sup> and Eric O. Long<sup>1\*</sup>

8

9 <sup>1</sup>Laboratory of Immunogenetics, National Institute of Allergy and Infectious Diseases, National  
10 Institutes of Health, Rockville, MD 20852, USA

11 <sup>2</sup>Department of Medicine, University of Minnesota, Minneapolis, Minnesota, USA

12 <sup>3</sup>Laboratory of Malaria Immunology and Vaccinology, National Institute of Allergy and  
13 Infectious Diseases, National Institutes of Health, Rockville, MD 20852, USA

14 <sup>4</sup>Malaria Research and Training Centre, Department of Epidemiology of Parasitic Diseases,  
15 International Center of Excellence in Research, University of Sciences, Techniques and  
16 Technologies of Bamako, Bamako, Mali

17 <sup>5</sup>Laboratory of Malaria and Vector Research, National Institute of Allergy and Infectious  
18 Diseases, National Institutes of Health, Rockville, MD 20852, USA

19

20 \*For correspondence: eLong@nih.gov

21 **Abstract**

22

23 Antibodies acquired naturally through repeated exposure to *Plasmodium falciparum* are essential  
24 in the control of blood-stage malaria. Antibody-dependent functions may include neutralization of  
25 parasite–host interactions, complement activation, and activation of Fc receptor functions. A role  
26 of antibody-dependent cellular cytotoxicity (ADCC) by natural killer (NK) cells in protection from  
27 malaria has not been established. Here we show that IgG isolated from adults living in a malaria-  
28 endemic region activated ADCC by primary human NK cells, which lysed infected red blood cells  
29 (RBCs) and inhibited parasite growth in an in vitro assay for ADCC-dependent growth inhibition.  
30 RBC lysis by NK cells was highly selective for infected RBCs in a mixed culture with uninfected  
31 RBCs. Human antibodies to *P. falciparum* antigens PfEMP1 and RIFIN were sufficient to promote  
32 NK-dependent growth inhibition. As these results implicate acquired immunity through NK-  
33 mediated ADCC, antibody-based vaccines that target bloodstream parasites should consider this  
34 new mechanism of action.

## 35 **Introduction**

36

37 *Plasmodium falciparum* (*P.f.*), the causative agent of malaria, expresses proteins that are displayed  
38 at the surface of infected red blood cells (RBCs). Some of these proteins promote sequestration of  
39 *P.f.*-infected RBCs (iRBCs) through adhesion to vascular endothelial cells (Miller, Baruch, Marsh,  
40 & Doumbo, 2002). Humans living in malaria-endemic areas generate, over years of repeated  
41 infections, antibodies (Abs) to *P.f.* proteins that contribute to the gradual protection from malaria  
42 symptoms (Boyle et al., 2015; Bull & Marsh, 2002; Cohen, Mc, & Carrington, 1961; Mayor et al.,  
43 2015; Tran et al., 2013). One of the main objectives in malaria research is to define the mechanisms  
44 by which naturally acquired Abs provide protection (Cohen et al., 1961; Crompton et al., 2014).  
45 Acquired immunity to malaria is complex as it requires a balance of parasite growth inhibition and  
46 control of inflammation (Zhou et al., 2015). Neutralizing Abs that prevent *P.f.* merozoite invasion  
47 of RBCs have been described (Douglas et al., 2011). However, as merozoites released from late-  
48 stage iRBCs rapidly invade uninfected RBCs (uRBCs), high antibody titers are likely needed for  
49 inhibition. Abs bound to iRBCs promote phagocytosis by myeloid cells, and Abs bound to  
50 merozoites activate the complement pathway (Bouharoun-Tayoun, Oeuvray, Lunel, & Druilhe,  
51 1995; Boyle et al., 2015; Rowe, Moulds, Newbold, & Miller, 1997).

52 Natural killer (NK) cells constitute about 10% of peripheral blood lymphocytes. They kill  
53 virus-infected cells and tumor cells through engagement of an array of germ-line encoded co-  
54 activation receptors (Bryceson, March, Ljunggren, & Long, 2006a; Cerwenka & Lanier, 2001). In  
55 addition to their innate ability to eliminate transformed and infected cells, NK cells perform Ab-  
56 dependent cellular cytotoxicity (ADCC) through the low affinity IgG receptor Fc $\gamma$ RIIIa (also  
57 known as CD16), thereby killing IgG-coated target cells and secreting pro-inflammatory cytokines

58 such as IFN- $\gamma$  and TNF- $\alpha$ . A clear role of NK cells in contributing to protection from malaria, and  
59 whether iRBCs could be eliminated through ADCC by NK cells, have not been established (Wolf,  
60 Sherratt, & Riley, 2017). Earlier studies have described direct lysis of iRBCs by NK cells in the  
61 absence of Abs or Ab-dependent inhibition of *P. falciparum* growth by NK cells (Mavoungou,  
62 Luty, & Kremsner, 2003; Orago & Facer, 1991). However, other studies have not confirmed such  
63 results (Wolf et al., 2017). Here, we present a detailed study of the activity of primary,  
64 unstimulated human NK cells mixed with RBCs, infected or not by *P.f.*, and evaluate the NK cell  
65 responses using several different quantitative assays. We found that IgG in plasma from subjects  
66 living in a malaria-endemic region in Mali bound to iRBCs and induced their rapid lysis through  
67 NK-mediated ADCC. Naturally acquired IgG specific for the major *P.f.* antigen PfEMP1 was  
68 sufficient to promote NK-dependent inhibition of *P.f.* growth in RBCs. Our results demonstrated  
69 that primary human NK cells alone are capable of controlling parasite growth *in vitro* in response  
70 to IgG from subjects exposed to malaria. This may represent an important component of Ab-  
71 dependent clinical immunity to *P.f.* blood-stage infection that could be exploited in the  
72 development of malaria vaccines.

73 **Results**

74

75 **Primary human NK cells are activated by *P.f.*-infected RBCs in presence of plasma from**  
76 **malaria-exposed individuals**

77 RBCs infected with *P.f.* strain 3D7 were enriched for the presence of knobs at the RBC surface  
78 (Figure S1A). Knobs are protrusions at the surface of iRBCs that appear at the trophozoite stage.  
79 iRBC cultures were enriched for the trophozoite stage by percoll-sorbitol gradient. Enrichment  
80 was confirmed by Giemsa stain (Figure S1B). A pool of plasma from malaria-exposed adults living  
81 in a high transmission region of Mali (Mali plasma) was tested for the presence of Abs to the  
82 surface of *P.f.* 3D7-iRBCs at the trophozoite stage by flow cytometry. Adults at the Mali study  
83 site are considered ‘semi-immune’ to malaria, as they generally control parasitemia and rarely  
84 experience malaria symptoms (Tran et al., 2013). Abs in Mali plasma stained iRBCs but not  
85 uRBCs (Figure 1A). In contrast, Abs in a pool of serum from malaria-naïve US adults (US serum)  
86 did not bind to iRBCs any more than they did to uRBCs (Figure 1A). Binding of Abs in Mali  
87 plasma to iRBCs was confirmed by immunofluorescence microscopy (Figure 1B). Lower  
88 magnification images of mixed uRBCs and iRBCs showed that staining by Mali plasma was  
89 selective for iRBCs (Figure S1C).

90 We tested the reactivity of primary NK cells, freshly isolated from the blood of healthy malaria-  
91 naïve US donors, to iRBCs in the absence of Abs. NK cells did not degranulate during co-  
92 incubation with iRBCs, as monitored by staining with anti-LAMP-1 CD107a Ab (Figure 1C and  
93 1D). As binding of FcγRIIIA to IgG alone is sufficient to induce activation of resting NK cells  
94 (Bryceson, March, Barber, Ljunggren, & Long, 2005), IgG bound to RBCs has the potential to  
95 induce NK cell degranulation and cytokine production. We first tested stimulation of NK cells in

96 the presence of a polyclonal serum of rabbits that had been immunized with human RBCs.  
97 Degranulation by NK cells occurred during incubation with iRBCs in the presence of rabbit anti-  
98 RBC Abs (Figure 1C and 1D). Notably, potent NK cell degranulation occurred with iRBCs in the  
99 presence of Mali plasma, whereas US serum induced degranulation in a very small fraction of NK  
100 cells (Figure 1C and 1D). NK cell expression of intracellular interferon (IFN)- $\gamma$  and tumor necrosis  
101 factor (TNF)- $\alpha$  was also stimulated equally well by rabbit anti-RBC serum and Mali plasma,  
102 whereas US serum did not induce cytokine production (Figure 1E, 1F and S1D). These results  
103 suggested that Abs from malaria-exposed individuals activate NK cells when bound to iRBCs,  
104 which results in NK cell degranulation and production of cytokines.

105

106 **Selective lysis of *P.f.*-infected RBCs by primary NK cells in the presence of plasma**  
107 **from malaria-exposed individuals**

108 We next investigated whether NK cells could selectively lyse Ab-coated iRBCs without causing  
109 bystander lysis of uRBCs. uRBCs and iRBCs were labeled with either efluor450 or efluor670 dyes,  
110 which bind cellular proteins containing primary amines, and NK cells were labeled with the  
111 lipophilic dye PKH67. The three cell types were incubated together at equal numbers, and  
112 examined by live microscopy. Images were acquired in a temperature-controlled chamber every  
113 30 seconds for several hours (Movie file M1, M2). Representative images taken at 0, 2, and 4 h  
114 are shown in Figure 2A. Quantitative analysis of cell numbers, which were determined every  
115 minute, showed that all three cell types remained at a constant ratio when incubated with US serum  
116 (Figure 2B, left panel). In contrast, NK cells selectively lysed iRBCs in the presence of Mali  
117 plasma, leaving uRBCs intact (Figure 2B, right panel). A compilation of four experiments, each  
118 performed with NK cells from a different donor, showed iRBC lysis induced by Mali plasma but

119 not US serum (Figure 2C, left panel), and selective lysis of iRBCs in the presence of Mali plasma  
120 (Figure 2C, right panel). The relative change in the frequency of uRBCs and iRBCs over 3 hours  
121 in the presence of US serum or Mali plasma is shown in Movie files M1 and M2. We concluded  
122 that lysis of *P.f.*-iRBCs by NK cells in the presence of plasma from malaria-exposed individuals  
123 was efficient and specific, causing minimal bystander lysis of uRBCs.

124

### 125 **NK cells inhibit *P.f.* growth in RBCs in the presence of IgG from malaria-exposed individuals**

126 The fraction of RBCs invaded by merozoites (also known as parasitemia) in *P.f.*-infected  
127 individuals typically ranges from 0.005 to 5% (Goncalves et al., 2014). We tested the ability of  
128 NK cells to inhibit parasite growth in an RBC culture that was set at 1% parasitemia. As the ratio  
129 of NK cells to iRBCs was set at 3:1 and 1:1, NK cells were outnumbered by a 30 to 100 fold excess  
130 of uRBCs during incubation. Cultures were maintained for 48 hours before analysis (Figure S2A).  
131 Given that iRBC cultures were synchronized at the ring stage and enriched at the trophozoite-  
132 stage, a single round of RBC rupture and reinvasion of fresh RBCs by released merozoites occurred  
133 in the next ~18 hours. *P.f.* growth was determined by counting iRBCs in blood smears. In the  
134 absence of Abs, growth inhibition was 5.69%±11.53% at an E:T ratio of 3 (Figure 2D). A similar  
135 result was obtained in the presence of US serum (4.33%±12.15%; Figure 2D). In contrast, in the  
136 presence of Mali plasma, inhibition of parasite growth was 62.56%±15.41% at an E:T ratio of 3  
137 (Figure 2D). Strong growth inhibition occurred also at an E:T ratio of 1 (Figure 2D). A much  
138 reduced inhibition occurred with Mali plasma in the absence of NK cells (11.55%±1.99%), which  
139 could be due to Ab-mediated inhibition of merozoite reinvasion. We concluded that NK cells, in  
140 the presence of plasma from malaria-exposed individuals, are capable of inhibiting blood-stage  
141 *P.f.* growth even in the presence of a 100-fold excess of uRBCs. The results further suggested that

142 maturation of trophozoites and schizonts into infectious merozoites was inhibited by NK-mediated  
143 ADCC toward iRBCs.

144 The standard growth inhibition assay (GIA) (Malkin et al., 2005) was modified in order to  
145 remove Abs that inhibit *P.f.* growth through neutralization of merozoites. NK cells were first co-  
146 incubated with trophozoite-enriched iRBCs for 6 hours, in the presence or absence of Mali plasma.  
147 Cultures were then washed to remove unbound Abs and soluble factors prior to addition of a 100-  
148 fold excess of fresh uRBCs. Cultures were further incubated for 16 hours to allow for a single  
149 round of merozoite release and reinvasion of uRBCs (Figure S2B). We refer to this assay for  
150 inhibition by NK-mediated ADCC as GIA-ADCC. Parasitemia at the end of the experiment was  
151 determined by flow-cytometry (Figure S2C). Inhibition of *P.f.* growth occurred in the presence of  
152 Mali plasma but not in the presence of US serum (Figure 2E). These results showed that inhibition  
153 of *P.f.* growth was due to Abs bound to iRBCs prior to the release of merozoites and the addition  
154 of uRBCs, confirming the role of NK cell-mediated ADCC.

155 As NK cell-mediated ADCC triggered by Fc $\gamma$ RIIIa is dependent on binding to IgG, we tested  
156 whether IgG in Mali plasma was sufficient to promote NK-dependent inhibition of *P.f.* growth.  
157 IgG purified from US serum did not bind to uRBCs (Figure S2D) or to trophozoite-stage iRBCs  
158 (Figure 2F), whereas IgG purified from Mali plasma bound to iRBCs (Figure 2F) but not uRBCs  
159 (Figure S2D). In the GIA-ADCC, designed to exclude merozoite neutralization as the basis for  
160 inhibition, purified IgG from Mali plasma inhibited *P.f.* growth (37.59% $\pm$ 12.15% inhibition at an  
161 IgG concentration of 1.8 mg/ml) (Figure 2G). No inhibition was observed with IgG purified from  
162 US serum (Figure 2G). These results demonstrated that IgG from malaria-exposed individuals  
163 promotes inhibition of *P.f.* growth in RBCs in the presence of NK cells.

164



165 **PfEMP1 is a major target of naturally acquired antibodies that induce NK-dependent lysis**  
166 **of iRBCs**

167 The *P.f.* erythrocyte membrane protein 1 (PfEMP1), which mediates parasite sequestration through  
168 binding to vascular endothelial cells, is a major target of host Ab responses (Bull & Marsh, 2002;  
169 Chan et al., 2012). We used the parasite line DC-J, which lacks PfEMP1 expression (Dzikowski,  
170 Frank, & Deitsch, 2006), to test the importance of PfEMP1 in promoting Ab-dependent NK cell  
171 activation. Staining of *P.f.* DC-J-iRBCs with Mali plasma gave a positive signal that was  
172 approximately one log less than staining of 3D7-iRBCs (Figure 3A), but greater than staining of  
173 *P.f.* DC-J-iRBCs with US serum (Figure 3B). Time-lapse imaging was used to monitor lysis of  
174 DC-J-iRBCs by NK cells in the presence of Mali plasma during co-incubation with an equal  
175 number of uRBCs (Figure 3C). NK cells did not lyse DC-J-iRBCs in the presence of Mali plasma  
176 (movie file M3). Data from 4 experiments with NK cells from different donors indicated no  
177 significant decrease in iRBCs in the presence of Mali plasma compared to US serum over the  
178 course of 3 h (Figure 3D). Therefore, residual Ab-binding in the absence of PfEMP1 (Figure 3A)  
179 was not sufficient, under the conditions used, to promote NK-mediated ADCC in the presence of  
180 Mali plasma.

181 We wanted to test whether the lack of lysis of *P.f.* DC-J-iRBCs by NK cells could perhaps be  
182 due to an intrinsic resistance of DC-J to NK-mediated lysis. To test it we used the rabbit anti-serum  
183 raised against human RBCs, which activated degranulation by NK cells in the presence of 3D7-  
184 iRBCs (Figure 1C, 1D). We further developed a quantitative RBC lysis assay based on hemoglobin  
185 (Hb) release into the supernatant. Maximum Hb release from RBCs was defined as Hb in detergent  
186 lysates of RBCs (Figure S3A). This control also served to compensate for the loss of Hb during  
187 *P.f.* development in RBCs, as the parasite digests some of the Hb to produce hemozoin. Severe

188 damage to RBCs, as determined by Hb release, occurred at NK cell to RBC ratios of 3:1 and 10:1,  
189 after a 5 h incubation with 3D7-iRBCs in the presence of rabbit anti-RBC Abs (Figure S3B and  
190 S3C). At an NK cell to iRBC ratio of 5:1,  $47.16\% \pm 8.76\%$  of total Hb content was released (Figure  
191 3E). A small amount of Hb was released in the absence of NK cells ( $1.36\% \pm 0.51\%$ ) and in the  
192 absence of rabbit anti-RBC Abs ( $4.38\% \pm 1.65\%$ ) (Figure 3E). Similar data were obtained with  
193 uRBCs under the same conditions, where  $47.15\% \pm 13.1\%$  of total Hb content was released (Figure  
194 3E). We concluded that uRBCs and 3D7 *P.f.*-iRBCs were equally sensitive to NK-mediated  
195 ADCC.

196 This approach gave us an opportunity to test whether DC-J-iRBCs were inherently resistant to  
197 NK-mediated ADCC. Lysis assays in the presence of rabbit anti-RBC Abs and NK cells were  
198 performed. The extent of Hb release ( $52.66\% \pm 11.34\%$ ) after incubation at an NK cell to DC-J-  
199 iRBC ratio of 5:1 for 5 h was comparable to that obtained with uRBCs and 3D7-iRBCs (Figure  
200 3E). Hemoglobin release in the absence of rabbit anti-human RBC Abs was minimal. Therefore,  
201 we concluded that the lack of lysis of DC-J-iRBCs in the presence of Mali plasma was not due to  
202 resistance to NK-dependent ADCC, but rather to the low amount of Abs bound to RBCs infected  
203 with this PfEMP1-deficient parasite strain. Together, these data suggested that naturally acquired  
204 Abs to PfEMP1 play a critical role in NK cell-mediated destruction of iRBCs.

205

## 206 **The Fc $\gamma$ RIIIa binding site of human IgG1 Fc is required for NK-dependent lysis of *P.f.*-** 207 **infected RBCs**

208 Abs with broad reactivity against certain members of the RIFIN family of *P.f.* proteins have  
209 recently been cloned from memory B cells of malaria-exposed individuals in Kenya, Mali and  
210 Tanzania (Pieper et al., 2017; Tan et al., 2016). Similar to PfEMP1, RIFIN is a type of variant

211 antigen expressed on the surface of iRBCs. Using a *P.f.* 3D7 strain enriched for expression of  
212 RIFIN (Figure 4A), we tested NK-dependent lysis of RIFIN<sup>+</sup> iRBCs in the presence of the RIFIN-  
213 specific human monoclonal Ab MGD21. Lysis occurred during incubation with NK cells at an NK  
214 cell to iRBC ratio of 5:1 for 6 hours, as measured by Hb release (Figure 4B). Negligible lysis was  
215 observed in the absence of NK cells or in the absence of MGD21. We then tested a variant of  
216 monoclonal Ab MGD21 (MGD21-LALA), into which mutations had been introduced in the Fc to  
217 reduce binding to Fc receptors (Tan et al., 2016). Staining of iRBCs indicated that MGD21 and  
218 MGD21-LALA bound similarly to RIFIN<sup>+</sup> iRBCs (Figure 4A). However, in the presence of NK  
219 cells, only MGD21, and not MGD21-LALA, induced Hb release (Figure 4B), demonstrating that  
220 an intact Fc receptor-binding site was required for NK cell stimulation. In addition, we concluded  
221 that *P.f.* antigens other than PfEMP1 have the potential to induce NK-dependent ADCC in the  
222 presence of specific Abs.

223

#### 224 **Naturally acquired human IgG specific for pregnancy-associated VAR2CSA antigen** 225 **promotes NK-dependent lysis of infected RBCs**

226 To further define antigenic epitopes with the potential to induce NK-dependent ADCC toward *P.f.*-  
227 iRBCs, we tested polyclonal, affinity-purified IgG from rabbits that had been immunized with the  
228 Duffy binding-like 3x (DBL3x) domain of the PfEMP1 variant VAR2CSA (Obiakor et al., 2013).  
229 This rabbit IgG stained VAR2CSA-iRBCs, as measured by flow cytometry (Figure 4C). The  
230 VAR2CSA-specific rabbit IgG, but not control rabbit serum IgG, induced Hb release from  
231 VAR2CSA-iRBCs after incubation with NK cells (Figure 4D). Uninfected RBCs were not lysed  
232 in the presence of VAR2CSA-specific rabbit IgG (Figure S4A). These results showed that domain

233 DBL3x was accessible to Abs at the surface of VAR2CSA-iRBCs, and oriented in such a way that  
234 bound Abs could engage FcγRIIIA on NK cells.

235 To test the potential of naturally acquired Abs to VAR2CSA PfEMP1 to promote NK-  
236 dependent inhibition of *P.f.* growth in RBCs, we used human IgG isolated from pooled plasma of  
237 multigravid women, and affinity-purified on DBL domains of VAR2CSA PfEMP1 (Doritchamou  
238 et al., 2016). This natural IgG stained VAR2CSA-iRBCs, as measured by flow cytometry, whereas  
239 human IgG Abs against another parasite antigen, AMA1, did not (Figure 4E). NK cells were  
240 incubated with trophozoite-stage enriched RBCs infected by *P.f.* VAR2CSA for 6 h in the presence  
241 of IgG Abs. A 100-fold excess of uRBCs was added and incubation resumed for 42 h. In the  
242 presence of naturally acquired human IgG specific for VAR2CSA PfEMP1, *P.f.* growth was  
243 inhibited by 49.88%±8.49%, which was similar to inhibition obtained with rabbit anti-DBL3x IgG  
244 (60%±11.29%) (Figure 4F, S4B). No inhibition was observed in the absence of NK cells (Figure  
245 S4C). These results showed that naturally acquired Abs to PfEMP1 induce NK-mediated ADCC,  
246 which inhibits parasite growth in RBCs.

247 **Discussion**

248

249 The main objective of our study was to test whether NK cells could help control blood-stage  
250 malaria by lysing iRBCs through ADCC. Considering the essential role of Abs in conferring  
251 clinical immunity to individuals living in areas of high *P.f.* transmission (Cohen et al., 1961), and  
252 the limited efficacy of malaria vaccines tested so far, any immune effector function that depends  
253 on Abs needs to be evaluated. We provide strong evidence of Ab-dependent NK cell cytotoxicity  
254 towards *P.f.*-iRBCs in the presence of Abs from malaria-exposed individuals in Mali. NK cell  
255 responses to iRBCs and their effect on *P.f.* growth in culture were tested using primary,  
256 unstimulated human NK cells. Lysis of iRBCs by NK cells, in the presence of Abs to *P.f.* antigens  
257 exposed at the surface of iRBCs, was highly selective, leaving most uRBCs intact. NK cell-  
258 mediated ADCC inhibited *P.f.* growth in RBC cultures. Human Abs specific for a single class of  
259 *P.f.* antigens expressed at the surface of RBCs, such as PfEMP1 and RIFIN, were sufficient to  
260 induce NK cell cytotoxicity and *P.f.* growth inhibition. We propose that NK-dependent ADCC  
261 may be an effective mechanism to limit parasite growth, as it combines the powerful cytotoxicity  
262 of innate NK cells with the specificity of Abs generated by adaptive immunity.

263 The developmental cycle of *P.f.* in iRBCs provides a window of opportunity for Ab-dependent  
264 immune effector responses. Following merozoite invasion of RBCs, *P.f.* proteins begin to appear  
265 at the RBC surface after 16-20 hours and remain exposed until infectious merozoites are released.  
266 Once released, merozoites rapidly invade fresh RBCs (Boyle et al., 2010). Therefore, it is likely  
267 that high Ab titers are needed to neutralize merozoites and block entry into RBCs. In contrast,  
268 RBCs harboring non-infectious *P.f.*, as it progresses through trophozoite and schizont stages,  
269 display *P.f.* antigens at their surface for more than 24 hours, and ADCC responses activated by

270 Fc $\gamma$ RIIIa in primary human NK cells are rapid, strong and independent of coactivation signals  
271 (Bryceson et al., 2005).

272 Evidence of NK cell activation and RBC lysis was obtained with three different assays: 1) NK  
273 cell degranulation and cytokine production by flow cytometry, 2) loss of intact *P.f.*-iRBCs by live  
274 imaging, and 3) RBC lysis by measurement of Hb release. NK cell degranulation in a co-culture  
275 with *P.f.*-iRBCs, selectively induced by Abs from malaria-exposed individuals, was just as strong  
276 as that obtained with rabbit polyclonal antiserum raised against human RBCs. Furthermore, using  
277 Hb-release assays and rabbit anti-RBC serum, it was possible to show that iRBCs are not inherently  
278 more resistant or sensitive than uRBCs to NK-mediated lysis. Live imaging of a coculture of NK  
279 cells, uRBCs and *P.f.*-iRBCs, in the presence of plasma from malaria-exposed individuals,  
280 revealed selective lysis of iRBCs, with no 'bystander' lysis of uRBCs.

281 Natural cytotoxicity of NK cells towards *P.f.*-iRBCs was not detected in our assays with resting  
282 NK cells. A recent study in humanized mice reconstituted with human lymphocytes and injected  
283 with *P.f.*-infected human RBCs, reported some lysis of *P.f.*-iRBCs by NK cells (Chen et al., 2014).  
284 It is possible that under specific stimulatory conditions, including soluble factors and contact with  
285 other cells, human NK cells exhibit natural cytotoxic responses towards *P.f.*-iRBCs. However,  
286 considering that clinical immunity to malaria depends in large part on Abs, and that development  
287 of an effective vaccine is a high priority, we chose to focus on ADCC by NK cells. Signaling in  
288 NK cells by Fc $\gamma$ RIIIa alone, independently of other co-activation signals and of integrin-dependent  
289 adhesion, is sufficient to induce strong responses, unlike other NK activation receptors, which  
290 require synergy through combinations of co-activation receptors (Bryceson et al., 2005; Bryceson,  
291 March, Ljunggren, & Long, 2006b). The Ab-mediated activation of NK cell cytotoxicity described  
292 here is adding a strong effector mechanism to the other mechanisms by which Abs may confer

293 protection against malaria, including neutralizing Abs and Abs that activate the complement  
294 pathway (Boyle et al., 2015).

295 We have shown that NK cell-mediated ADCC inhibits the growth of *P.f.* in RBC cultures in  
296 the presence of Abs to *P.f.* antigens expressed at the surface of iRBCs in a standard growth  
297 inhibition assay (GIA) by co-incubation of iRBCs and NK cells with a large excess of uRBCs. To  
298 distinguish inhibition by NK cells from other Ab-dependent functions, such as merozoite  
299 neutralization and activation of complement, we developed a two-step GIA to evaluate inhibition  
300 that had occurred prior to iRBC rupture and reinvasion of fresh RBCs. As inhibition of *P.f.* growth  
301 occurred in the presence of purified IgG from plasma of malaria-exposed individuals, other serum  
302 components were not required for NK-mediated inhibition. The modified GIA for ADCC could  
303 help define *P.f.* antigens that induce Abs of sufficient titer and quality for FcR activation (e.g. IgG  
304 isotype, glycosylation). The GIA-ADCC is well-suited to large screens of plasma from subjects in  
305 malaria vaccine trials or in studies of naturally acquired immunity to malaria.

306 Previous work has shown that IL-2 produced by T cells following malaria infection or injection  
307 of a malaria vaccine activates IFN- $\gamma$  production by NK cells (Wolf et al., 2017). In addition, *P.f.*  
308 infection activates IL-18 secretion by macrophages. Through IL-18 and direct contact with  
309 macrophages NK cells are activated to produce IFN- $\gamma$  (Baratin et al., 2005; Wolf et al., 2017). In  
310 contrast, the effector functions of NK cells we describe here are independent of external signals,  
311 since unstimulated primary NK cells respond directly to activation by multivalent IgG Fc binding  
312 to Fc $\gamma$ RIIIa (Bryceson et al., 2005). Experiments performed here used NK cells freshly isolated  
313 from human blood, without stimulation prior to incubation with RBCs and Abs. In summary, we  
314 have shown that human NK cells have the potential to control *P.f.* parasitemia through IgG-

315 dependent activation of NK cellular cytotoxicity, and thus contribute to protection from blood-  
316 stage malaria.



## 317 **Materials and Methods**

318 **Study approval:** This study was approved by the Ethics Committee of the Faculty of Medicine,  
319 Pharmacy, and Dentistry at the University of Sciences, Techniques, and Technologies of Bamako,  
320 in Mali and by the Institutional Review Board of the National Institute of Allergy and Infectious  
321 Diseases, National Institutes of Health. Prior to inclusion in this study, written informed consent  
322 was received from participants.

323 **Antibody sources:** Plasma samples were collected from adults enrolled in a multi-year malaria  
324 study in the rural village Kambila (Crompton et al., 2008), by starting with venous blood collected  
325 in citrate-containing cell-preparation tubes (BD, Franklin Lakes, NJ). Samples were transported  
326 45 km away to the Malaria Research and Training Centre in Bamako, where peripheral blood  
327 mononuclear cells (PBMCs) and plasma were isolated. Plasma was frozen in 1-ml aliquots at  
328  $-80^{\circ}\text{C}$ . Samples were shipped to the United States on dry ice for analysis. Control US serum was  
329 obtained from Valley Biomedical (Winchester, VA).

330 **Enrichment of antibody:** IgG was purified from plasma or serum by standard affinity  
331 chromatography. Briefly, each sample was diluted 1:5 in column equilibration-wash buffer (10  
332 mM  $\text{NaPO}_4$ , 150 mM NaCl, pH 7.0). The IgG fraction was isolated on Protein G columns (GE  
333 Healthcare, Amersham-Pharmacia-HiTrap Protein G) and eluted with 100 mM glycine, pH  
334 2.5. and immediately neutralized to pH 7.4 with 4.0 M Tris pH 8.0. IgG was concentrated and  
335 dialyzed in Pall Macrosep columns (30 kDa MW cutoff) with PBS.

336 **NK Cell isolation:** Human blood samples from deidentified healthy US donors were drawn for  
337 research purposes at the NIH Blood Bank under an NIH IRB approved protocol with informed  
338 consent. PBMCs were first isolated using Lymphocyte Separation Medium  
339 (MP Biomedicals, Solon, OH), washed with PBS twice, and resuspended in PBS, with 2% FBS

340 and 1 mM EDTA. NK cells were isolated from PBMCs by depletion of non-NK cells using an NK  
341 cell isolation kit (STEMCELL Technologies, Cambridge, MA). The manufacturer's protocol was  
342 modified as follows. PBMCs were resuspended at  $2 \times 10^8$ , per ml and 2.5  $\mu$ l/ml of anti-CD3 biotin  
343 (STEMCELL Technologies) was added to the 50  $\mu$ l/ml of the non-NK cocktail to increase NK cell  
344 purity. Resting NK cells were resuspended in Iscove's modified Dulbecco's medium (IMDM;  
345 Invitrogen, Carlsbad, CA) supplemented with 10% human serum (Valley Biomedical, Winchester,  
346 VA), and were used within 1 to 4 days after isolation. Only NK cell preparations that had greater  
347 than 95% CD14neg, CD3neg, CD56pos, as determined by flow cytometry, were used in  
348 experiments.

349 **Cultivation and purification of *P. falciparum*:** 3D7 and FCR3 VAR2CSA strains were cultivated  
350 at 37°C under 5% O<sub>2</sub>, 5% CO<sub>2</sub>, 90% N<sub>2</sub> at 37°C at <5% hematocrit using O<sup>+</sup> human erythrocytes  
351 (Interstate Blood Bank, Inc.). The *P.f.* DC-J strain was cultivated similarly in the presence of  
352 Blasticidin (2.5  $\mu$ g/ml). Parasites were cultured in complete medium, which was RPMI 1640  
353 buffered with 25 mM HEPES and supplemented with 2.5% heat-inactivated Human AB Serum,  
354 0.5% Albumax-II, 28 mM sodium bicarbonate, 25  $\mu$ g/ml gentamycin, and 50  $\mu$ g/ml hypoxanthine.  
355 Parasite development was monitored by light microscopy using methanol-fixed, Giemsa-stained  
356 thin blood films. Parasites were synchronized using sorbitol (Lambros & Vanderberg, 1979).  
357 Parasite-iRBCs were enriched for knobs using Zeptogel (contains gelatin) sedimentation routinely.  
358 Infected RBCs used in ADCC assays were enriched at the trophozoite stage with percoll-sorbitol  
359 gradient and centrifugation (Aley, Sherwood, & Howard, 1984; Hill et al., 2007), washed, and  
360 resuspended in complete medium in the absence of human serum. Cultures growing in Albumax-  
361 II therefore had no antibodies or complement components.

362 **Immunostaining and Immunofluorescence analysis:** iRBCs, enriched at the trophozoite stage,  
363 were resuspended in PBS and 2% FBS, and incubated at 4°C for 30 minutes with plasma, serum,  
364 or purified antibodies at specified dilutions. Cells were washed and incubated at 4°C with  
365 appropriate and fluorescently-tagged secondary Abs for an additional 20 minutes. Cells were  
366 washed, and flow cytometry was performed on a FACS LSR-II or a FACS Calibur (BD  
367 Biosciences), and data analyzed with FlowJo (FlowJo, LLC). For immunofluorescence analysis,  
368 iRBCs, enriched at the trophozoite stage, were mixed with uRBCs at a ratio of 1:1 and incubated  
369 with US Serum or Mali Plasma for 30 minutes at 4°C. Cells were washed and incubated with  
370 fluorescently –tagged secondary Abs for an additional 20 minutes. Cells were first washed, and  
371 then fixed with 1% paraformaldehyde (PFA) at room temperature. DAPI was used to visualize the  
372 *P.f.* DNA in iRBCs. Immunofluorescence images were obtained on a LSM 780 confocal laser  
373 microscope (Carl Zeiss, Oberkochen, Germany). Images were acquired using the Zen software  
374 (Carl Zeiss).

375 **Scanning Electron Microscopy:** uRBCs and iRBCs were washed with 0.1 M phosphate buffer  
376 (pH 7.4). RBCs were centrifuged at 2500 rpm for 5 minutes and supernatants were removed. RBCs  
377 were again washed with 0.1 M phosphate buffer (pH 7.4). RBCs were resuspended in 3 ml of  
378 fixative solution (3% PFA + 0.1% glutaraldehyde). The cells were stored at 4°C until further  
379 processing for imaging. Fixed cells were allowed to settle on silicon chips for 1 hr. Subsequent  
380 post-fixation with 1% OsO<sub>4</sub> was performed with microwave irradiation (Pelco 3451 microwave  
381 processor, in cycles of 2 min on, 2 min off, 2 min on at 250 W under 15 in. Hg vacuum; Ted Pella,  
382 Redding, CA). Specimens were dehydrated in a graded ethanol series for 1 min under vacuum.  
383 Samples were then dried to a critical point in a Bal-Tec cpd 030 drier (Balzer, Bal-Tec AG, Balzers,  
384 Liechtenstein). Cells were then coated with 75 Å of iridium in an IBS ion beam sputter (South

385 Bay Technology, Inc., San Clemente, CA.) Samples were imaged on a Hitachi SU-8000 SEM  
386 (Hitachi, Pleasantown, CA).

387 **Degranulation and intracellular cytokine assays:** Resting NK cells ( $2 \times 10^5$ ) either alone or  
388 mixed with enriched iRBCs ( $2 \times 10^5$ ) were added to wells of a 96-well plate, in the presence of  
389 antibodies (either US serum diluted 1:10, Mali plasma diluted 1:10, or rabbit anti-human RBC  
390 antibody at 1.25  $\mu\text{g/ml}$ ). Anti-CD107a Ab-PE diluted 1:20 (Clone H4A3, Cat#555801, BD  
391 Biosciences, Franklin Lakes, NJ) was added at the beginning of the incubation with NK cells. Cells  
392 were centrifuged for 3 minutes at 100g and incubated for 4 hours at 37°C. Cells were centrifuged,  
393 resuspended in PBS containing 2% FBS, and stained with conjugated anti-CD56-PC5.5 Ab (Clone  
394 N901, Beckman Coulter, Brea, CA), near-IR fixable Live/Dead dye (Invitrogen), and CD235a-  
395 FITC (Clone H1264, Biolegend, San Diego, CA). Samples were analyzed on a FACS-LSRII flow  
396 cytometer (BD Biosciences) and data analyzed with FlowJo software (FlowJo, LLC). For  
397 intracellular cytokine assays, NK cells were incubated with iRBCs as described above in the  
398 presence of Brefeldin A (5  $\mu\text{g/ml}$ ) during the 4 hour incubation. Cells were then stained with anti-  
399 CD56-PC5.5 Ab (Clone N901, Beckman Coulter, Brea, CA), near-IR fixable Live/Dead dye  
400 (Invitrogen), CD235a-FITC (Clone H1264, Biolegend, San Diego, CA), followed by fixation and  
401 permeabilization using the BD Cytofix/Cytoperm Kit (BD Biosciences). IFN- $\gamma$  was detected using  
402 anti-IFN- $\gamma$ -APC Ab (Clone B27, BD Biosciences) and TNF- $\alpha$  was detected using anti-TNF- $\alpha$ -  
403 PE Ab (Clone 6401.1111, BD Bioscience). Samples were resuspended in PBS and analyzed on a  
404 FACS LSRII flow cytometer (BD Biosciences). Data analysis was performed with FlowJo  
405 software (FlowJo, LLC).

406 **Time-lapse imaging:** NK cells, uRBCs and iRBCs were washed twice with PBS before labeling  
407 with different dyes. iRBCs were stained with cell proliferation dye efluor 670 at 5  $\mu\text{M}$  for 5

408 minutes in PBS at 37°C. Similarly, uRBCs were stained with efluor 450 dye at 2.5 µM  
409 concentration for 5 minutes in PBS at 37°C. NK cells were washed, suspended in diluent C and  
410 stained with 1 µM PKH67 membrane dye (PKH67 green fluorescent green linker kit, Sigma-  
411 Aldrich) for 5 minutes at 37°C. Cells were then washed 3 times with media containing serum (e.g.,  
412 RPMI with 10% FBS). For imaging, cells were resuspended in RPMI 1640 containing 0.5%  
413 Albumax-II in the absence of Phenol Red. Cells were added in 8-well Lab-Tek I Chambered cover  
414 glass (Nunc) and allowed to settle for 15 minutes. Imaging was performed with a Zeiss LSM 780  
415 confocal microscope while maintaining incubation condition at 37°C, 5% CO<sub>2</sub>, in a humidified  
416 chamber. Images were acquired at 30 seconds interval for 6 hours. Time-lapse image stacks were  
417 imported into the Imaris software. A threshold algorithm eliminated background noise from each  
418 channel, and a Gaussian filter was applied to smooth the texture, and to easily segment the regions  
419 of interest (ROIs). After filtering, a surface channel was created from each color channel for each  
420 cell population, with surface threshold based on intensity. The surface generator was set to run a  
421 watershed algorithm. The seed-points diameter was set to 4.5 µm for iRBCs and uRBCs, and  
422 6.0 µm for NK cells. In order to weed out unwanted particles that passed the intensity threshold, a  
423 surface ROI was considered to be one with voxel size greater than 110 voxels. For the tracking  
424 algorithm we used autoregressive motion with maximum step distance set to 5 µm and maximum  
425 gap size set to 2 frames.

426 **Growth inhibition assay (GIA):** NK cells were incubated with  $20 \times 10^3$  trophozoite-stage iRBCs  
427 at NK to iRBC ratios of 1:1 and 3:1 in the presence of  $20 \times 10^5$  uRBCs in 96-well plates for 48  
428 hour at 37°C, in complete medium. Thin blood smears were fixed in 100% methanol, stained with  
429 5% Giemsa solution and counted under light microscope. 25 microscope fields, each containing  
430 200 RBCs, were counted. Parasitemia was expressed as [(number of iRBCs ÷ total number of

431 RBCs)  $\times 100$ ].  $2.5 \times 10^5$  NK cells and  $5 \times 10^4$  FCR3 VAR2CSA–iRBCs were mixed in 96-well  
432 plates and incubated for 6 hour at 37°C in the absence or presence of purified rabbit IgG antibodies  
433 to the DBL3 domain (0.5 mg/ml), or purified human IgG antibodies to the DBL domains of  
434 PfEMP1 VAR2CSA (0.5 mg/ml), or control rabbit IgG (0.5 mg/ml) in a final volume of 25  $\mu$ l. A  
435 100-fold excess of uRBCs ( $5 \times 10^6$ ) was then added, bringing the final volume to 100  $\mu$ l. Cultures  
436 were then maintained for an additional 42 hr at 37°C in standard parasite growth conditions. At  
437 the end of incubation, CD45-PE (Clone H130, Biolegend, San Diego, CA) and CD235a-FITC  
438 antibodies, and Hoechst were used to stain NK cells, uRBCs and iRBCs. Samples were acquired  
439 on FACSLSR-II, and data analyzed with FlowJo (FlowJo, LLC). Parasitemia was determined as  
440 the fraction of RBCs (CD235a<sup>+</sup>) positive for Hoechst. Samples with NK cells but in the absence  
441 of antibodies were used as control to calculate growth inhibition.

442 **GIA-ADCC assay:** NK cells and iRBCs were resuspended in experimental media (no human  
443 serum).  $6 \times 10^5$  NK cells and  $2 \times 10^5$  iRBCs were mixed at a 3:1 ratio in 96-well plates and  
444 incubated for 6 hour at 37°C in the absence or presence of antibodies. For experiments using  
445 plasma, the total amount of plasma in each condition was (20  $\mu$ l plasma into 200  $\mu$ l media) to  
446 control for the level of plasma. 20  $\mu$ l of US plasma the negative control, then increasing volume  
447 of Mali immune plasma was added in (Example: 2  $\mu$ l Mali plasma with 18  $\mu$ l US plasma totaling  
448 20  $\mu$ l plasma). After a 6 hour coincubation of iRBCs and NK cells, soluble Abs were removed by  
449 a wash. This washing step removed any antibody that would bind to merozoites. A 100-fold excess  
450 of uRBCs ( $2 \times 10^7$ ) relative to iRBCs was then added and cultures were maintained for an  
451 additional 16 hr at 37°C in standard parasite growth conditions. At the end of incubation, CD45-  
452 PE (BD Biosciences), CD235a-FITC, and Hoechst were used to stain NK cells, uRBCs and iRBCs

453 (supplemental figure S2C). Samples with NK cells but in the absence of antibodies were used as  
454 control to calculate growth inhibition.

455 **Hemoglobin release assay:** Enriched iRBCs and NK cells were washed with RPMI 1640,  
456 containing 0.5 % Albumax in the absence of Phenol red. Cells were mixed at defined ratios in 96-  
457 well V bottom plates in 150  $\mu$ l. Antibodies were added as specified. Antibodies tested in the assay  
458 are Rabbit anti-human RBC antibodies (1.25  $\mu$ g/ml), MGD21 and MGD21-LALA antibodies (Tan  
459 et al., 2016) (0.2 mg/ml), Rabbit VAR2CSA and Control IgG antibodies (0.5 mg/ml). Cells were  
460 centrifuged at 100g for 3 minutes and incubated at 37°C for 5-6 hours as mentioned. Plate were  
461 centrifuged at 2000 rpm for 5 minutes and 50  $\mu$ l of supernatant was collected. Hemoglobin was  
462 measured with QuantiChrom™ Hemoglobin Assay Kit (BioAssay, Hayward, CA). Hemoglobin  
463 absorbance was measured at 405 nm using a 96-well plate reader (Enspire, Perkin Elmer, MA and  
464 SpectraMax plus, Molecular Devices, CA). In each experiment, maximum hemoglobin release was  
465 determined by lysis of iRBCs in 1% Triton-X-100. At the end of the 5 h incubation period, the  
466 hemoglobin released in supernatant was quantified as percent fraction of maximum hemoglobin  
467 release. Hemoglobin released during the 5 h incubation period in iRBCs sample was subtracted in  
468 each experiment to normalize the background in all experiments.

469 **Statistical analysis:** Each graph was generated from at least three independent experiments. For  
470 normally distributed data, either mean $\pm$ SD or mean $\pm$ SEM was used, as specified. Statistical  
471 analysis was performed using the software Graphpad Prism v7. Data was analyzed by either two-  
472 tailed Student's t test, or by one-way analysis of variance (ANOVA).

473 **Acknowledgments**

474 We thank A. Ring for *P.f.* 3D7 strain enriched for knobs, K. Deitsch for *P.f.* DC-J strain, A.  
475 Lanzavecchia for Abs MGD21 and MGD21-LALA, and *P.f.* 3D7 strain enriched for RIFIN  
476 expression, B. Hansen for scanning electron microscopy, L. Lantz for IgG purification, J. Skinner  
477 for statistics, and A. Sajid for comments on the manuscript.

478

479 **Additional Information**

480

481 **Competing Interests**

482 L.M.Thomas has employment and equity ownership with Intrexon Corporation. The other  
483 authors declare that no competing interests exist.

484

485 **Funding**

486 **Funder**

487 Division of Intramural Research, National Institute of Allergy and Infectious Diseases, National Institutes  
488 of Health

489 **Grant reference**      Z01 AI000525-30 LIG

490 **Author**                Eric O Long

491

492 **Author contributions**

493 Conceptualization: G.A., G.T.H., S.K.P., L.H.M., P.D.C., and E.O.L.; Methodology/Design: G.A.,  
494 G.T.H., J.M.-L., J.B., S.R., L.H.M., S.A.D., and E.O.L.; Investigation: G.A., G.T.H., and J.M.-L.;  
495 Resources: J.Y.A.D., D.L.N., L.M.T., O.K.D., B.T., P.E.D., P.D.C., and S.A.D.; Writing –



496 Original Draft: G.A., G.T.H., and E.O.L.; Writing – Review & Editing: S.R., P.E.D., P.D.C., and  
497 S.A.D.; Supervision and Funding Acquisition: S.K.P., L.H.M., P.E.D., P.D.C., S.A.D., and E.O.L.

498

#### 499 **Author ORCIDS**

500 Eric Long, <http://orcid.org/0000-0002-7793-3728>

501 Patrick Duffy <https://orcid.org/0000-0002-4483-5005>

502

#### 503 **Ethics**

504 Human subjects: The Ethics Committee of the Faculty of Medicine, Pharmacy, and Dentistry at  
505 the University of Sciences, Techniques, and Technologies of Bamako, and the Institutional  
506 Review Board of the National Institute of Allergy and Infectious Diseases, National Institutes of  
507 Health approved this study. Written informed consent and consent to publish was received from  
508 participants prior to inclusion in the study. Written informed consent and consent to publish was  
509 obtained from parents or guardians of participating children prior to inclusion in the study.  
510 NIAID IRB protocols 07-I-N141 or 06-I-N147.

511

#### 512 **Additional files**

513

#### 514 **Supplementary files**

- 515 • Supplementary file 1. Figure S1. Antibody-dependent cytokine response of NK cells in  
516 response to iRBCs.
- 517 • Supplementary file 2. Figure S2. Assays for NK-dependent parasite growth inhibition.
- 518 • Supplementary file 3. Figure S3. Hemoglobin release assay.

- 519       • Supplementary file 4. Figure S4. PfEMP1 antibodies activate NK-dependent lysis of  
520       iRBCs and inhibition of *P.f.* growth.
- 521       • Supplementary file 5. Table of reagents and Supplementary figure legends.
- 522       • Supplementary file 6. Movie file M1 shows a co-culture of NK cells, uRBC and iRBC in  
523       the presence of US serum, imaged for 104 minutes.
- 524       • Supplementary file 7. Movie file M2 shows a co-culture of NK cells, uRBC and iRBC in  
525       the presence of Mali plasma, imaged for 104 minutes.
- 526       • Supplementary file 8. Movie file M3 shows a co-culture of NK cells, uRBC and RBC  
527       infected with the PfEMP1-deficient *P.f.* strain DC-J in the presence of Mali plasma,  
528       imaged for 106 minutes.
- 529

530 **References**

- 531 Aley, S. B., Sherwood, J. A., & Howard, R. J. (1984). Knob-positive and knob-negative  
532 Plasmodium falciparum differ in expression of a strain-specific malarial antigen on the surface of  
533 infected erythrocytes. *J Exp Med*, 160(5), 1585-1590.
- 534 Baratin, M., Roetynck, S., Lepolard, C., Falk, C., Sawadogo, S., Uematsu, S., . . . Ugolini, S.  
535 (2005). Natural killer cell and macrophage cooperation in MyD88-dependent innate responses to  
536 Plasmodium falciparum. *Proc Natl Acad Sci U S A*, 102(41), 14747-14752.  
537 doi:10.1073/pnas.0507355102
- 538 Bouharoun-Tayoun, H., Oeuvray, C., Lunel, F., & Druilhe, P. (1995). Mechanisms underlying  
539 the monocyte-mediated antibody-dependent killing of Plasmodium falciparum asexual blood  
540 stages. *J Exp Med*, 182(2), 409-418.
- 541 Boyle, M. J., Reiling, L., Feng, G., Langer, C., Osier, F. H., Aspeling-Jones, H., . . . Beeson, J.  
542 G. (2015). Human antibodies fix complement to inhibit Plasmodium falciparum invasion of  
543 erythrocytes and are associated with protection against malaria. *Immunity*, 42(3), 580-590.  
544 doi:10.1016/j.immuni.2015.02.012
- 545 Boyle, M. J., Wilson, D. W., Richards, J. S., Riglar, D. T., Tetteh, K. K., Conway, D. J., . . .  
546 Beeson, J. G. (2010). Isolation of viable Plasmodium falciparum merozoites to define  
547 erythrocyte invasion events and advance vaccine and drug development. *Proc Natl Acad Sci U S*  
548 *A*, 107(32), 14378-14383. doi:10.1073/pnas.1009198107
- 549 Bryceson, Y. T., March, M. E., Barber, D. F., Ljunggren, H. G., & Long, E. O. (2005). Cytolytic  
550 granule polarization and degranulation controlled by different receptors in resting NK cells. *J*  
551 *Exp Med*, 202(7), 1001-1012.
- 552 Bryceson, Y. T., March, M. E., Ljunggren, H. G., & Long, E. O. (2006a). Activation,  
553 coactivation, and costimulation of resting human natural killer cells. *Immunol Rev*, 214, 73-91.
- 554 Bryceson, Y. T., March, M. E., Ljunggren, H. G., & Long, E. O. (2006b). Synergy among  
555 receptors on resting NK cells for the activation of natural cytotoxicity and cytokine secretion.  
556 *Blood*, 107(1), 159-166.
- 557 Bull, P. C., & Marsh, K. (2002). The role of antibodies to Plasmodium falciparum-infected-  
558 erythrocyte surface antigens in naturally acquired immunity to malaria. *Trends Microbiol*, 10(2),  
559 55-58.

- 560 Cerwenka, A., & Lanier, L. L. (2001). Natural killer cells, viruses and cancer. *Nat Rev Immunol*,  
561 *1*(1), 41-49. doi:10.1038/35095564
- 562 Chan, J. A., Howell, K. B., Reiling, L., Ataide, R., Mackintosh, C. L., Fowkes, F. J., . . . Beeson,  
563 J. G. (2012). Targets of antibodies against Plasmodium falciparum-infected erythrocytes in  
564 malaria immunity. *J Clin Invest*, *122*(9), 3227-3238. doi:10.1172/jci62182
- 565 Chen, Q., Amaladoss, A., Ye, W., Liu, M., Dummler, S., Kong, F., . . . Chen, J. (2014). Human  
566 natural killer cells control Plasmodium falciparum infection by eliminating infected red blood  
567 cells. *Proc Natl Acad Sci U S A*, *111*(4), 1479-1484. doi:10.1073/pnas.1323318111
- 568 Cohen, S., Mc, G. I., & Carrington, S. (1961). Gamma-globulin and acquired immunity to human  
569 malaria. *Nature*, *192*, 733-737.
- 570 Crompton, P. D., Moebius, J., Portugal, S., Waisberg, M., Hart, G., Garver, L. S., . . . Pierce, S.  
571 K. (2014). Malaria immunity in man and mosquito: insights into unsolved mysteries of a deadly  
572 infectious disease. *Annu Rev Immunol*, *32*, 157-187. doi:10.1146/annurev-immunol-032713-  
573 120220
- 574 Crompton, P. D., Traore, B., Kayentao, K., Doumbo, S., Ongoiba, A., Diakite, S. A., . . .  
575 Doumbo, O. K. (2008). Sick cell trait is associated with a delayed onset of malaria:  
576 implications for time-to-event analysis in clinical studies of malaria. *J Infect Dis*, *198*(9), 1265-  
577 1275. doi:10.1086/592224
- 578 Doritchamou, J. Y., Herrera, R., Aebig, J. A., Morrison, R., Nguyen, V., Reiter, K., . . . Duffy, P.  
579 E. (2016). VAR2CSA Domain-Specific Analysis of Naturally Acquired Functional Antibodies to  
580 Plasmodium falciparum Placental Malaria. *J Infect Dis*, *214*(4), 577-586.  
581 doi:10.1093/infdis/jiw197
- 582 Douglas, A. D., Williams, A. R., Illingworth, J. J., Kamuyu, G., Biswas, S., Goodman, A. L., . . .  
583 Draper, S. J. (2011). The blood-stage malaria antigen PfRH5 is susceptible to vaccine-inducible  
584 cross-strain neutralizing antibody. *Nat Commun*, *2*, 601. doi:10.1038/ncomms1615
- 585 Dzikowski, R., Frank, M., & Deitsch, K. (2006). Mutually exclusive expression of virulence  
586 genes by malaria parasites is regulated independently of antigen production. *PLoS Pathog*, *2*(3),  
587 e22. doi:10.1371/journal.ppat.0020022
- 588 Goncalves, B. P., Huang, C. Y., Morrison, R., Holte, S., Kabyemela, E., Prevots, D. R., . . .  
589 Duffy, P. E. (2014). Parasite burden and severity of malaria in Tanzanian children. *N Engl J*  
590 *Med*, *370*(19), 1799-1808. doi:10.1056/NEJMoa1303944

- 591 Hill, D. A., Pillai, A. D., Nawaz, F., Hayton, K., Doan, L., Lisk, G., & Desai, S. A. (2007). A  
592 blasticidin S-resistant *Plasmodium falciparum* mutant with a defective plasmodial surface anion  
593 channel. *Proc Natl Acad Sci U S A*, *104*(3), 1063-1068. doi:10.1073/pnas.0610353104
- 594 Lambros, C., & Vanderberg, J. P. (1979). Synchronization of *Plasmodium falciparum*  
595 erythrocytic stages in culture. *J Parasitol*, *65*(3), 418-420.
- 596 Malkin, E. M., Diemert, D. J., McArthur, J. H., Perreault, J. R., Miles, A. P., Giersing, B. K., . . .  
597 Durbin, A. P. (2005). Phase 1 clinical trial of apical membrane antigen 1: an asexual blood-stage  
598 vaccine for *Plasmodium falciparum* malaria. *Infect Immun*, *73*(6), 3677-3685.  
599 doi:10.1128/IAI.73.6.3677-3685.2005
- 600 Mavoungou, E., Luty, A. J., & Kremsner, P. G. (2003). Natural killer (NK) cell-mediated  
601 cytolysis of *Plasmodium falciparum*-infected human red blood cells in vitro. *Eur Cytokine Netw*,  
602 *14*(3), 134-142.
- 603 Mayor, A., Bardaji, A., Macete, E., Nhampossa, T., Fonseca, A. M., Gonzalez, R., . . .  
604 Menendez, C. (2015). Changing Trends in *P. falciparum* Burden, Immunity, and Disease in  
605 Pregnancy. *N Engl J Med*, *373*(17), 1607-1617. doi:10.1056/NEJMoa1406459
- 606 Miller, L. H., Baruch, D. I., Marsh, K., & Doumbo, O. K. (2002). The pathogenic basis of  
607 malaria. *Nature*, *415*(6872), 673-679. doi:10.1038/415673a
- 608 Obiakor, H., Avril, M., Macdonald, N. J., Srinivasan, P., Reiter, K., Anderson, C., . . . Miller, L.  
609 H. (2013). Identification of VAR2CSA domain-specific inhibitory antibodies of the *Plasmodium*  
610 *falciparum* erythrocyte membrane protein 1 using a novel flow cytometry assay. *Clin Vaccine*  
611 *Immunol*, *20*(3), 433-442. doi:10.1128/CVI.00638-12
- 612 Orago, A. S., & Facer, C. A. (1991). Cytotoxicity of human natural killer (NK) cell subsets for  
613 *Plasmodium falciparum* erythrocytic schizonts: stimulation by cytokines and inhibition by  
614 neomycin. *Clin Exp Immunol*, *86*(1), 22-29.
- 615 Pieper, K., Tan, J., Piccoli, L., Foglierini, M., Barbieri, S., Chen, Y., . . . Lanzavecchia, A.  
616 (2017). Public antibodies to malaria antigens generated by two LAIR1 insertion modalities.  
617 *Nature*, *548*(7669), 597-601. doi:10.1038/nature23670
- 618 Rowe, J. A., Moulds, J. M., Newbold, C. I., & Miller, L. H. (1997). *P. falciparum* rosetting  
619 mediated by a parasite-variant erythrocyte membrane protein and complement-receptor 1.  
620 *Nature*, *388*(6639), 292-295. doi:10.1038/40888

- 621 Tan, J., Pieper, K., Piccoli, L., Abdi, A., Perez, M. F., Geiger, R., . . . Lanzavecchia, A. (2016). A  
622 LAIR1 insertion generates broadly reactive antibodies against malaria variant antigens. *Nature*,  
623 529(7584), 105-109. doi:10.1038/nature16450
- 624 Tran, T. M., Li, S., Doumbo, S., Doumtabe, D., Huang, C. Y., Dia, S., . . . Crompton, P. D.  
625 (2013). An intensive longitudinal cohort study of Malian children and adults reveals no evidence  
626 of acquired immunity to Plasmodium falciparum infection. *Clin Infect Dis*, 57(1), 40-47.  
627 doi:10.1093/cid/cit174
- 628 Wolf, A. S., Sherratt, S., & Riley, E. M. (2017). NK Cells: Uncertain Allies against Malaria.  
629 *Front Immunol*, 8, 212. doi:10.3389/fimmu.2017.00212
- 630 Zhou, J., Feng, G., Beeson, J., Hogarth, P. M., Rogerson, S. J., Yan, Y., & Jaworowski, A.  
631 (2015). CD14(hi)CD16+ monocytes phagocytose antibody-opsonised Plasmodium falciparum  
632 infected erythrocytes more efficiently than other monocyte subsets, and require CD16 and  
633 complement to do so. *BMC Med*, 13, 154. doi:10.1186/s12916-015-0391-7

634

635 **Figure Legends**

636

637 **Figure 1. Primary human NK cells are activated by antibody-coated *P.f.*-iRBCs. (A)**

638 Uninfected RBCs (left) and trophozoite-stage iRBCs (right) were stained with serum pooled from

639 US individuals (red) and plasma pooled from individuals living in a malaria-endemic region of

640 Mali (green). Bound Abs were detected with AF488-conjugated anti-human IgG (H+L) antiserum.

641 (B) Immunofluorescence images of iRBCs stained with DAPI (blue) and with either US serum or

642 Mali plasma, as indicated. Anti-human IgG (H+L) antiserum labeled with AF488 (green) was used

643 to detect Ab-coated RBCs. (C) NK cells stained with PE-Cy5.5-conjugated CD56 and PE-

644 conjugated CD107a Abs. The fraction of CD107a<sup>+</sup> NK cells is indicated in each panel. (D) NK

645 cell degranulation measured by CD107a Ab staining. NK cells alone or co-incubated with iRBCs,

646 at a NK:RBC ratio of 1:1 for 4 h, in the absence or presence of Abs, as indicated. Rabbit polyclonal

647 anti-RBC serum (1:4000), US serum (1:10) and Mali plasma (1:10) were used. Circles indicate

648 individual NK cell donors, each with its own color. Data from independent experiments are shown

649 as mean±SD (p=0.0009). (E, F) Intracellular staining of IFN- $\gamma$  and TNF- $\alpha$ . Incubation conditions

650 and Abs as in (D) (p=0.0061 for E, 0.0050 for F). Data from independent experiments are shown as

651 mean±SD.

652

653 **Figure 2. Selective lysis of *P.f.* 3D7-iRBCs and parasite growth inhibition by primary NK**

654 **cells in the presence of immune plasma and IgG. (A)** Live imaging of primary NK cells (green)

655 co-incubated with uRBCs (blue) and iRBCs (red) at an equal ratio (1:1:1) in the presence of US

656 serum (1:10) and of Mali plasma (1:10). Representative snapshots taken at time 0, 2, and 4 h are

657 shown. (B) Quantitative analysis of cell numbers in the cultures shown in (A) in a 3 h period. Cell

658 numbers were normalized to 100 at the start of image acquisition. (C) Composite display of 4

659 independent experiments, each carried out with a different NK cell donor (dotted lines). The mean  
660 is shown as a solid line ( $p < 0.0001$ ). (D) Inhibition of parasite growth measured by counting blood  
661 smears of iRBCs. A parasite culture containing 1% iRBCs was incubated for 48 h in the absence  
662 (open circles) or presence of US serum (closed circles) or Mali plasma (triangles). Growth  
663 inhibition is represented as percent decrease in parasitemia relative to a culture with no NK cells  
664 and no Ab. Error bars represent standard deviation of the mean from 4 independent experiments  
665 ( $p < 0.0001$  for no NK or US serum group compared with Mali plasma groups in presence of NK  
666 cells). (E) Parasite growth inhibition measured by flow cytometry. Enriched trophozoite-stage  
667 iRBCs were incubated with NK cells at an NK:iRBC ratio of 3:1 for 6 h with either 20  $\mu$ l US serum  
668 or increasing amounts of Mali plasma in a final volume of 200  $\mu$ l. Cells were washed and incubated  
669 for another 16 h with a 100-fold excess of uRBCs (relative to the iRBC input). Inhibition is  
670 expressed as a percent decrease in parasitemia relative to parasitemia in iRBC cultures incubated  
671 with NK cells in the absence of Abs ( $p = 0.0294$ ). (F) Staining of iRBCs with IgG affinity-purified  
672 from US serum at 0.2 (orange) and 0.6 mg/ml (red), or from Mali plasma at 0.2 (blue) and 0.6  
673 mg/ml (green). (G) Growth inhibition assay performed as in (E) in the presence of purified IgG  
674 from US (black circles) or Mali individuals (green triangles) at the indicated concentrations  
675 ( $p(0.2) = 0.008$ ;  $p(0.6) = 0.003$ ;  $p(1.8) = 0.00007$ ).

676

677 **Figure 3. Naturally acquired antibodies to PfEMP1 have a predominant role in NK-mediated**  
678 **ADCC.** (A) Immunostaining of uRBCs with Mali plasma (shaded) and of RBCs infected with *P.f.*  
679 3D7 (green) or with *P.f.* DC-J parasites (blue). Bound Abs were detected with AF488-conjugated  
680 anti-human IgG (H+L) antiserum. (B) Staining of DC-J iRBCs with Abs from US serum (red) and  
681 Mali plasma (green). Secondary staining was as in (A). The shaded histogram represents staining



682 with secondary Ab alone. (C) Live imaging of primary NK cells (green) co-incubated with uRBCs  
683 (blue) and DC-J-iRBCs (red) at an equal ratio (1:1:1) in the presence of US serum (1:10) or Mali  
684 plasma (1:10). Cell counts for NK cells, DC-J-iRBCs and uRBCs were determined every minute  
685 for 3 h. Representative snapshots taken at time 0, 2 and 4 h are shown. (D) Cell numbers were  
686 normalized to 100 at the start of image acquisition. Composite display of 4 independent  
687 experiments, each carried out with a different NK cell donor (dotted lines). The mean is shown as  
688 a solid line. (E) NK cell-mediated ADCC towards uRBCs, *P.f.* 3D7 iRBCs and *P.f.* DC-J iRBCs.  
689 Cells were mixed at an NK:RBC ratio of 5:1 and incubated for 5 h in the presence or absence of  
690 rabbit anti-RBC serum (1:4000), as indicated. Hemoglobin release, measured using a Quantichrom  
691 Hb assay, is shown relative to release from RBCs treated with 1% Triton X-100. Data are shown  
692 (mean±SD) for NK cells from 4 independent donors ( $p=0.6054$ , comparing 3D7 and DC-J in  
693 presence of NK cells and Rabbit anti RBC Ab).

694

695 **Figure 4. Human antibodies to RIFIN and to PfEMP1 promote NK-dependent lysis of iRBCs**  
696 **and inhibition of *P.f.* growth.** (A) Staining of RBCs infected with a *P.f.* 3D7 strain enriched for  
697 expression of a RIFIN family member (PF3D7\_1400600) with human monoclonal Ab  
698 MGD21(green) or variant MGD21-LALA (red). The shaded histogram represents staining with  
699 AF488-conjugated anti-human IgG (H+L) antiserum alone. (B) Lysis of RIFIN<sup>+</sup> iRBCs incubated  
700 for 6 h in the absence of NK cells or at an NK to iRBC ratio of 5:1 in presence or absence of  
701 MGD21 or MGD21 LALA Abs, as indicated. Data are shown (mean±SD) for NK cells from four  
702 independent NK cell donors, as measured by Hb release ( $p = 0.0005$ ). (C) Staining of RBCs  
703 infected with *P.f.* FCR3 strain expressing VAR2CSA with rabbit polyclonal Ab to the DBL3x  
704 domain of PfEMP1 VAR2CSA (green) or with control rabbit serum (red). The shaded histogram

705 represents staining with secondary FITC-labeled anti-rabbit IgG alone. (D) Hemoglobin release  
706 measured after incubation of NK cells with VAR2CSA-iRBCs, at an NK to iRBC ratio of 5:1 for  
707 5 h, in the presence of affinity-purified IgG from control rabbit serum or from serum of rabbit  
708 immunized with VAR2CSA PfEMP1. Each color represents a single NK cell donor tested in  
709 independent experiments (n=6) (p = 0.0049). (E) Staining of iRBCs expressing *P.f.* VAR2CSA  
710 with human polyclonal Abs to either AMA1 antigen as control (red), or to the DBL domains of  
711 PfEMP1 VAR2CSA (green). The shaded histogram represents staining with AF488-conjugated  
712 anti-human IgG (H+L) antiserum alone. (F) Parasite GIA-ADCC analyzed by flow cytometry.  
713 Enriched trophozoite-stage FCR3 VAR2CSA-iRBCs were incubated with NK cells, at an NK to  
714 iRBC ratio of 5 for 6 h, in the presence of a control rabbit IgG (-), of rabbit anti-PfEMP1 IgG, and  
715 of human anti-PfEMP1 IgG, as indicated. A 100-fold excess of uRBCs (relative to the iRBCs  
716 input) was added, and incubation resumed for another 42 h. Inhibition is expressed as percent  
717 decrease in parasitemia relative to iRBCs that were incubated with NK cells in the absence of Abs  
718 (p = 0.0027).

Figure 1

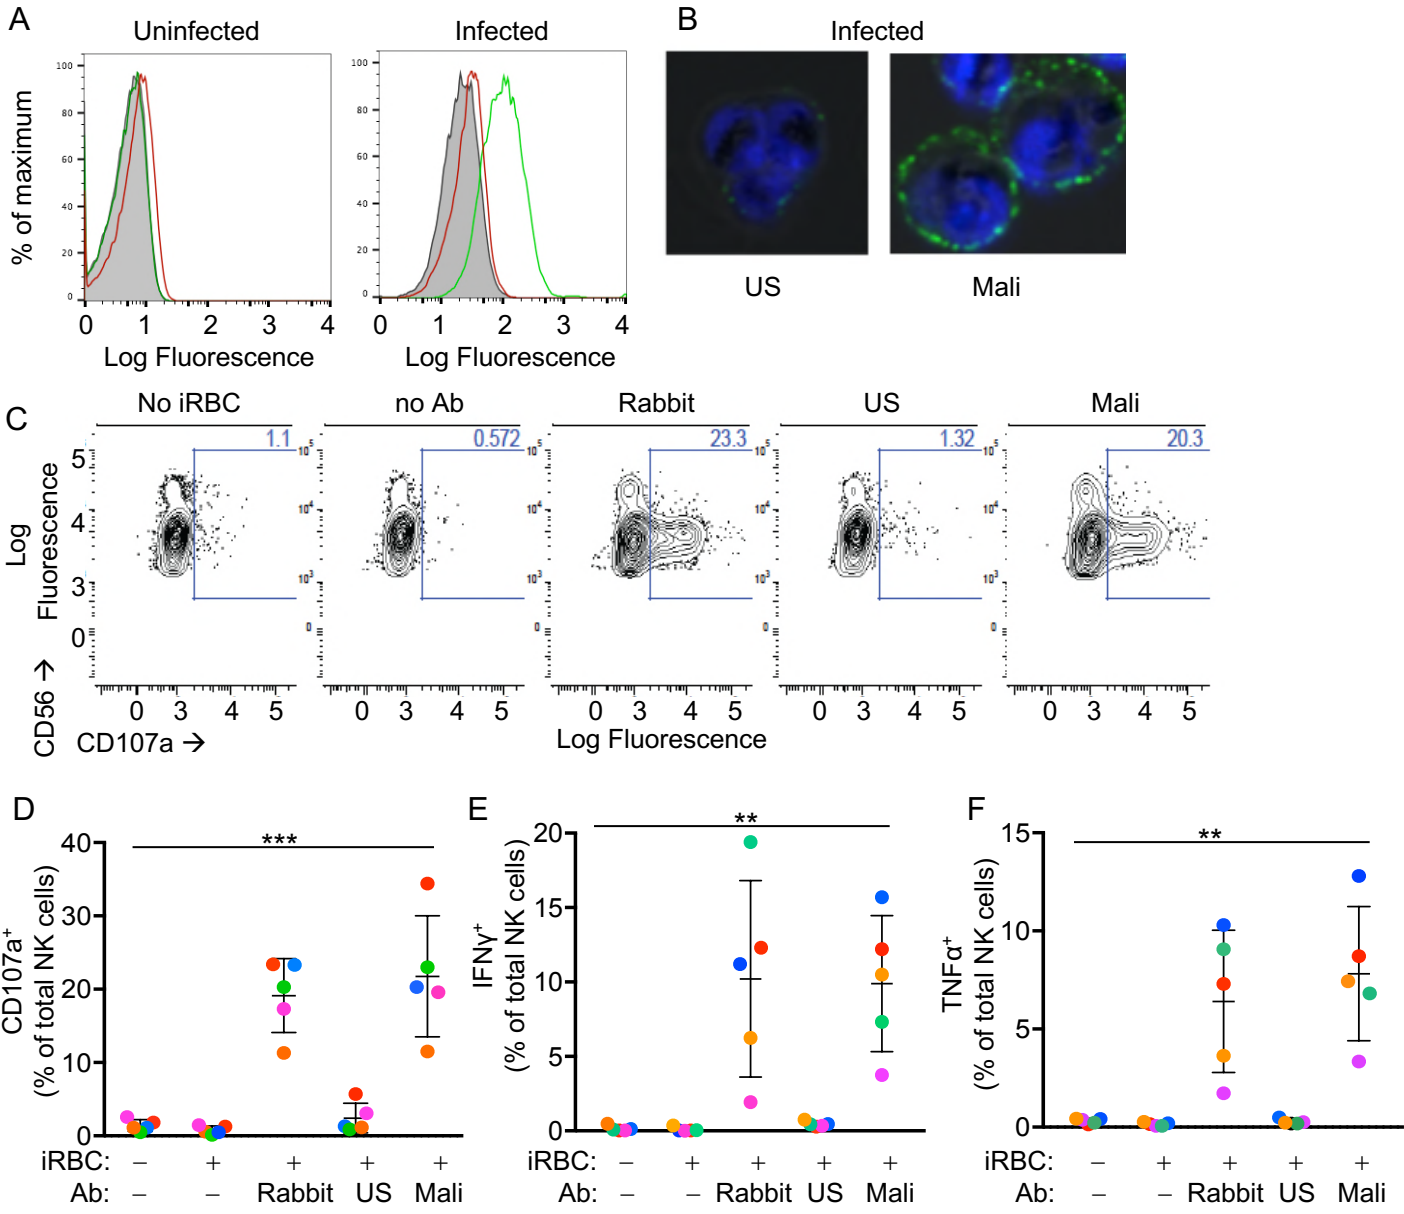

Figure 2

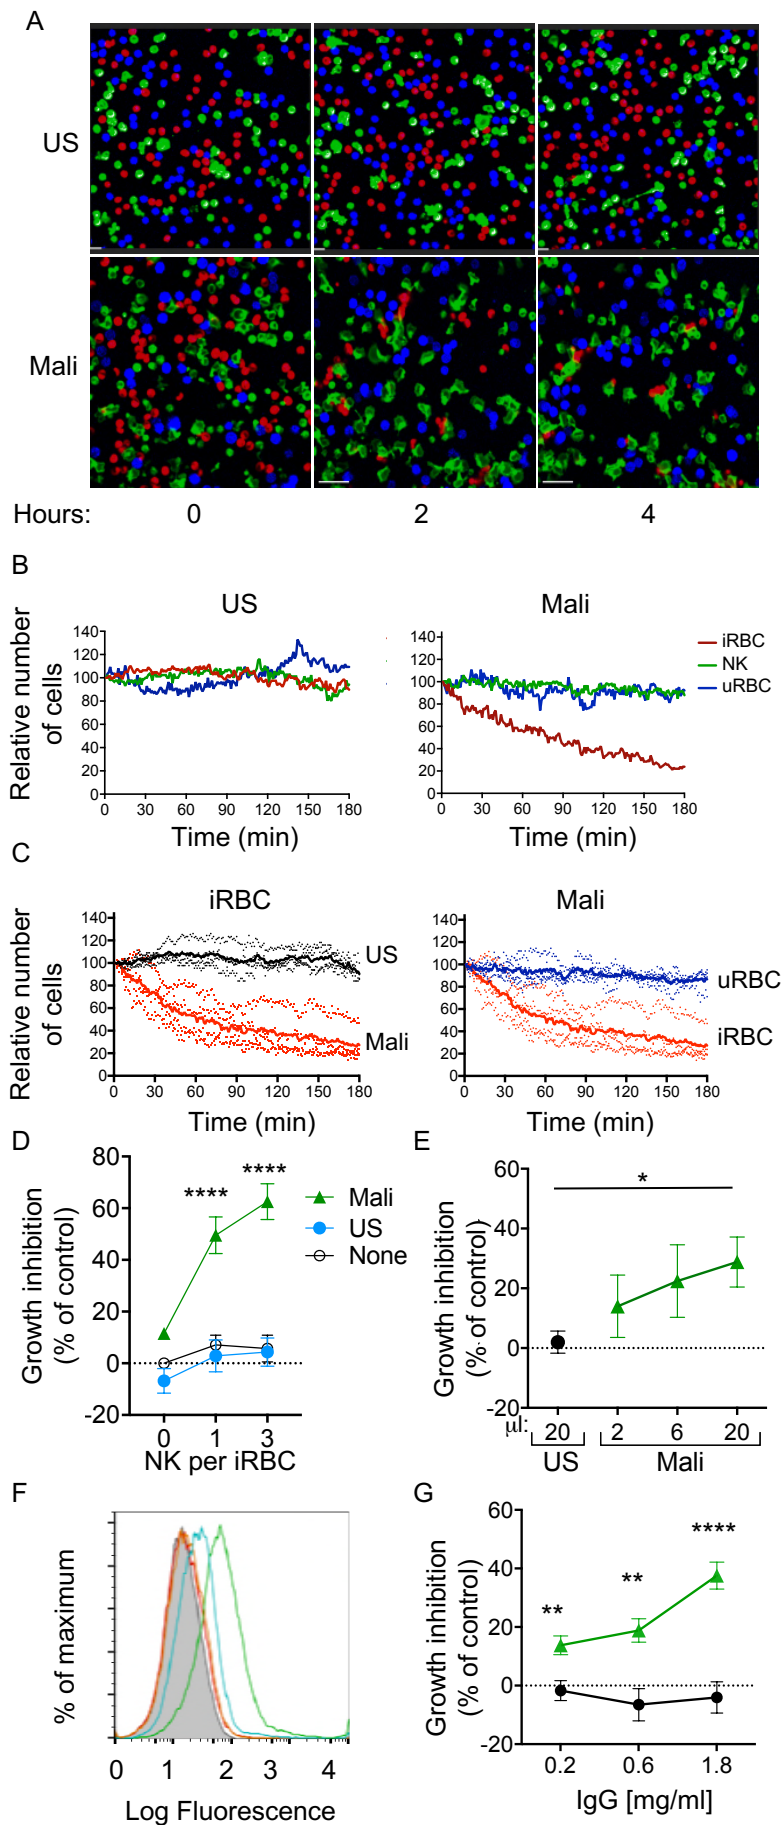

Figure 3

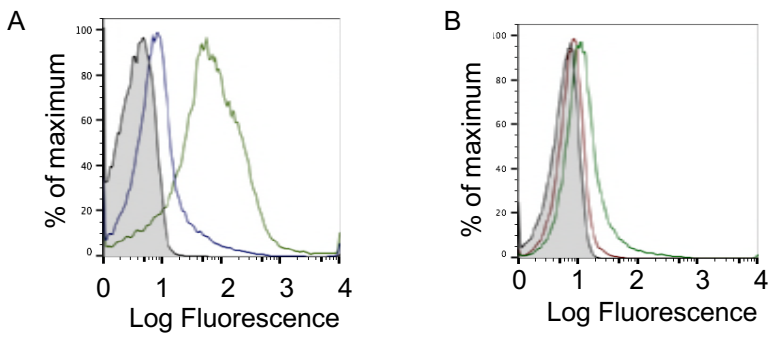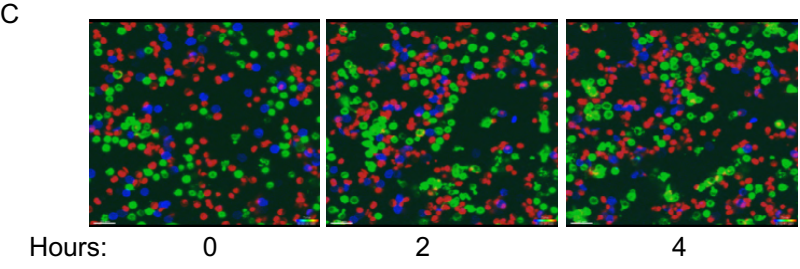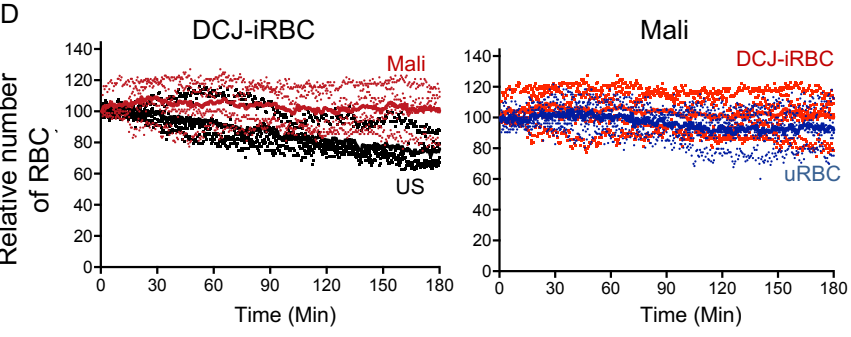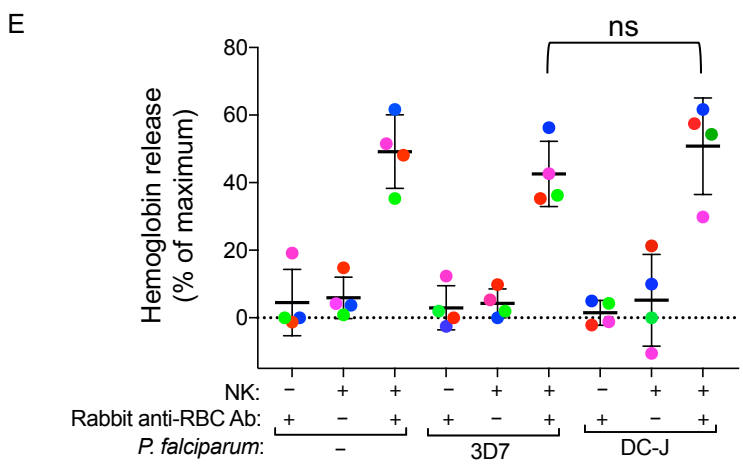

Figure 4

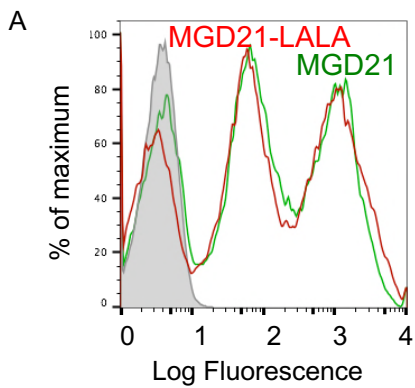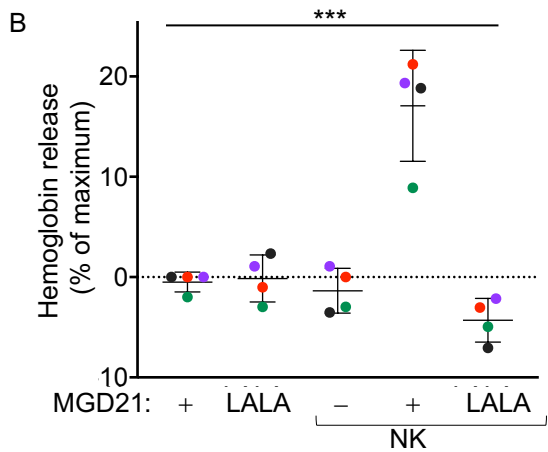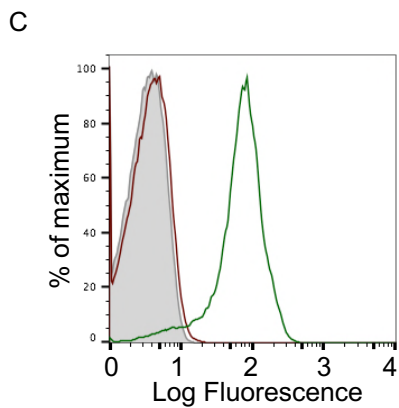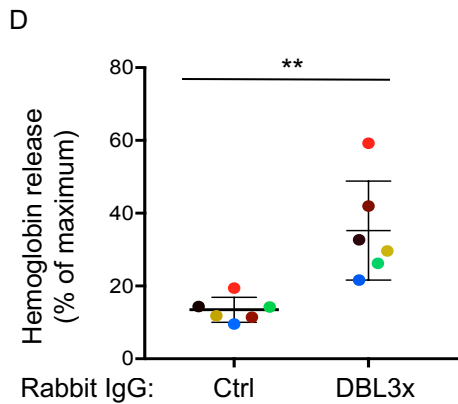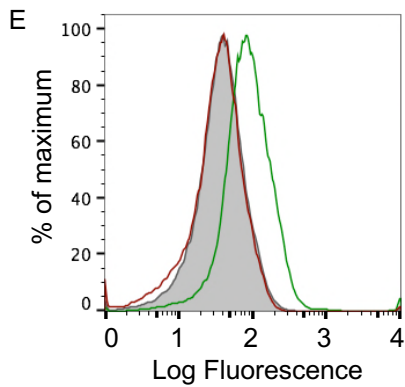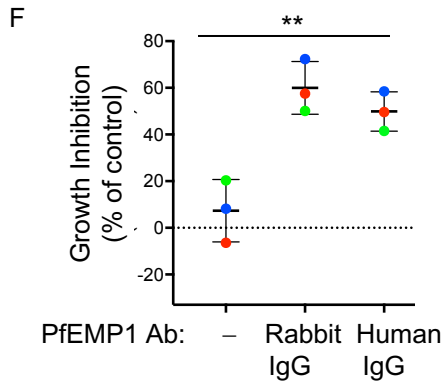

Source: http://biorxiv.org/content/10.1101/291336v1.full.pdf
